# Supplementary material
Source: HighWire-hosted journal article supplement (https://jnm.snmjournals.org/highwire/filestream/95103/field_highwire_adjunct_files/0/180422_Supplemental_Data.pdf)
Supplement: 180422_Supplemental_Data.pdf [file 180422_Supplemental_Data.pdf]

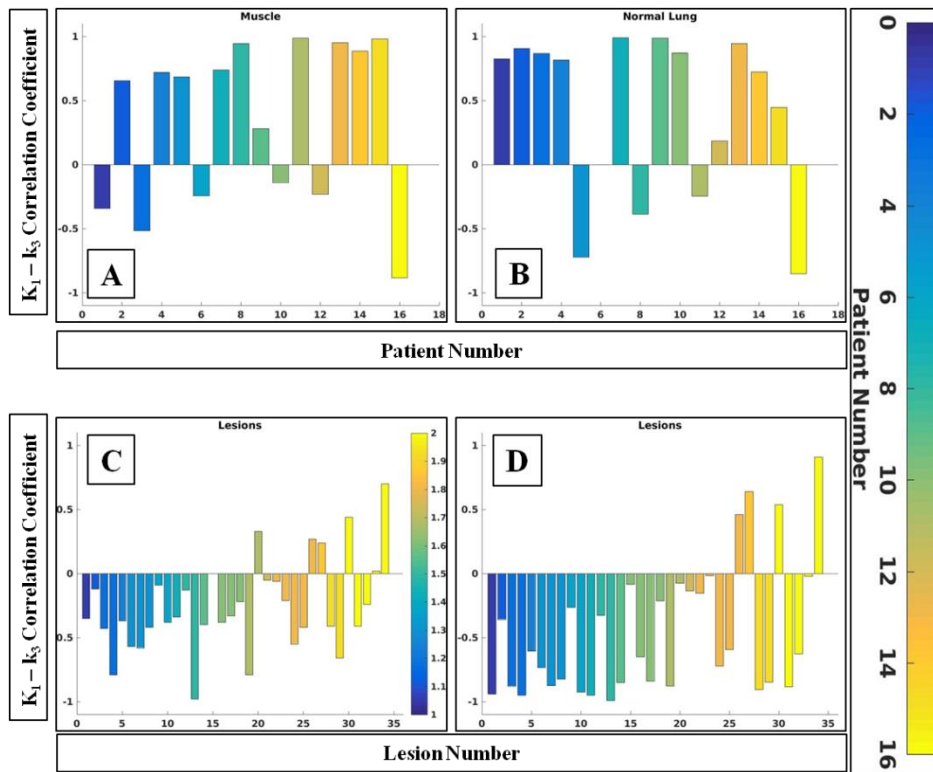

**Supplemental FIGURE 1.** Bar plots of the  $K_1 - k_3$  voxel-wise R for each patient for every: (A)  $VOI_{Muscle}$ , (B)  $VOI_{Normal}$ , (C)  $VOI_{Tumor}$  and (D) using deciles of voxels in  $VOI_{Tumor}$  to increase statistical power. Each color represents an individual patient.

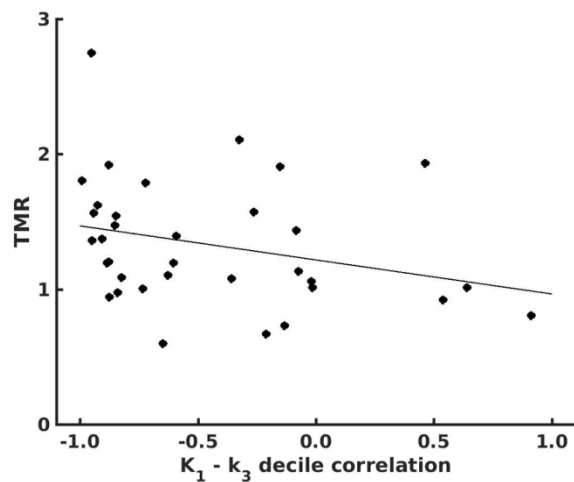

**Supplemental FIGURE 2.** Scatter plot of TMR for  $VOI_{Tumor}$  vs  $K_1 - k_3$  decile correlation coefficient. Each point represents one lesion.

**Supplemental Table 1.** PKA results for average lesion TACs for each patient (P).

| P  | VOI     | vB   | %SE<br>vB | K1<br>(mL/min/cc) | %SE<br>K <sub>1</sub> | K <sub>1</sub> /k <sub>2</sub> | %SE<br>K <sub>1</sub> /k <sub>2</sub> | k <sub>3</sub><br>(min <sup>-1</sup> ) | %SE<br>k <sub>3</sub> | K <sub>i</sub><br>(mL/min/cc) | %SE<br>K <sub>i</sub> |
|----|---------|------|-----------|-------------------|-----------------------|--------------------------------|---------------------------------------|----------------------------------------|-----------------------|-------------------------------|-----------------------|
| 1  | 1       | 0.04 | 23        | 0.13              | 6.4                   | 0.77                           | 2.5                                   | 7.50E-03                               | 6                     | 0.0055                        | 11                    |
| 2  | 1       | 0.18 | 9.8       | 0.14              | 5.7                   | 0.91                           | 1.8                                   | 1.90E-03                               | 12                    | 1.58E-04                      | 15                    |
| 3  | 1       | 0.06 | 42        | 0.21              | 14                    | 0.59                           | 4                                     | 2.10E-02                               | 7.2                   | 2.92E-03                      | 21                    |
|    | 2       | 0.01 | 80        | 0.13              | 9.3                   | 0.52                           | 3.2                                   | 1.50E-02                               | 5.6                   | 2.68E-03                      | 14                    |
| 4  | 1       | 0.08 | 19        | 0.11              | 6.8                   | 0.7                            | 2.4                                   | 2.90E-03                               | 12                    | 2.42E-04                      | 16                    |
| 5  | 1       | 0.14 | 24        | 0.16              | 11                    | 1.1                            | 3.5                                   | 1.20E-03                               | 33                    | 3.64E-05                      | 37                    |
|    | 2       | 0.17 | 20        | 0.18              | 9.8                   | 1.1                            | 3.1                                   | 1.20E-03                               | 28                    | 4.29E-05                      | 31                    |
|    | 3       | 0.19 | 27        | 0.17              | 8.7                   | 1.1                            | 3.2                                   | 1.30E-03                               | 7.1                   | 1.83E-04                      | 15                    |
| 6  | 1       | 0.03 | 17        | 0.08              | 11                    | 0.47                           | 3.2                                   | 1.00E-02                               | 10                    | 1.00E-03                      | 18                    |
|    | 2       | 0.15 | 8.7       | 0.12              | 4.2                   | 0.74                           | 1.7                                   | 4.90E-03                               | 5.6                   | 8.75E-04                      | 8.3                   |
| 7  | 1       | 0.10 | 16        | 0.11              | 7                     | 0.74                           | 2.3                                   | 7.50E-03                               | 6.9                   | 1.09E-03                      | 12                    |
| 8  | 1       | 0.14 | 11        | 0.17              | 11                    | 0.96                           | 3.7                                   | 6.10E-03                               | 12                    | 5.08E-04                      | 20                    |
|    | 2       | 0.39 | 15        | 0.13              | 7.7                   | 0.99                           | 2                                     | 4.90E-03                               | 13                    | 3.77E-04                      | 17                    |
| 9  | 1       | 0.11 | 14        | 0.16              | 8.7                   | 0.81                           | 2.7                                   | 2.00E-03                               | 10                    | 2.00E-04                      | 16                    |
| 10 | 1       | 0.11 | 26        | 0.12              | 25                    | 0.45                           | 12                                    | 3.10E-03                               | 19                    | 1.63E-04                      | 42                    |
|    | 2       | 0.10 | 8.8       | 0.07              | 21                    | 0.18                           | 7.9                                   | 4.50E-03                               | 100                   | 4.50E-05                      | 100                   |
|    | 3       | 0.45 | 11        | 0.06              | 15                    | 0.45                           | 6.9                                   | 4.20E-04                               | 28                    | 1.50E-05                      | 36                    |
|    | 4       | 0.23 | 13        | 0.07              | 4.6                   | 0.3                            | 1                                     | 1.10E-03                               | 16                    | 6.88E-05                      | 17                    |
| 11 | 1       | 0.09 | 23        | 0.25              | 11                    | 0.79                           | 2.4                                   | 8.20E-04                               | 100                   | 8.20E-06                      | 100                   |
|    | 2       | 0.15 | 10        | 0.23              | 6.7                   | 0.92                           | 1.8                                   | 0.00E+00                               | 48                    | 1.00E-08                      | 49                    |
| 12 | 1       | 0.16 | 21        | 0.13              | 7.2                   | 0.61                           | 2.7                                   | 3.60E-04                               | 10                    | 3.60E-05                      | 15                    |
| 13 | 1       | 0.05 | 18        | 0.10              | 11                    | 0.73                           | 3.1                                   | 4.00E-03                               | 12                    | 3.33E-04                      | 20                    |
|    | 2       | 0.08 | 15        | 0.11              | 13                    | 0.46                           | 3.6                                   | 3.70E-03                               | 8.3                   | 4.46E-04                      | 20                    |
|    | 3       | 0.16 | 17        | 0.19              | 14                    | 0.48                           | 3.3                                   | 7.60E-03                               | 13                    | 5.85E-04                      | 24                    |
|    | 4       | 0.22 | 13        | 0.21              | 8.4                   | 0.65                           | 2.7                                   | 3.30E-03                               | 8.8                   | 3.75E-04                      | 15                    |
|    | 5       | 0.16 | 16        | 0.12              | 16                    | 0.78                           | 5.4                                   | 5.50E-03                               | 56                    | 9.82E-05                      | 61                    |
| 14 | 1       | 0.17 | 16        | 0.05              | 11                    | 0.39                           | 2.7                                   | 8.50E-04                               | 15                    | 5.67E-05                      | 22                    |
| 15 | 1       | 0.14 | 14        | 0.17              | 8.1                   | 0.66                           | 1.9                                   | 5.00E-03                               | 6.3                   | 7.94E-04                      | 13                    |
|    | 2       | 0.09 | 14        | 0.20              | 8.5                   | 0.54                           | 2                                     | 6.20E-03                               | 15                    | 4.13E-04                      | 19                    |
| 16 | 1       | 0.14 | 16        | 0.18              | 6.8                   | 0.61                           | 1.5                                   | 1.20E-03                               | 5.4                   | 2.22E-04                      | 11                    |
|    | 2       | 0.05 | 27        | 0.23              | 23                    | 0.54                           | 5.5                                   | 3.60E-03                               | 100                   | 3.60E-05                      | 110                   |
|    | 3       | 0.29 | 14        | 0.10              | 15                    | 0.79                           | 2.9                                   | 0.00E+00                               | 46                    | 1.04E-22                      | 51                    |
|    | 4       | 0.37 | 29        | 0.25              | 17                    | 0.88                           | 3.8                                   | 6.50E-04                               | 47                    | 1.38E-05                      | 53                    |
|    | 5       | 0.13 | 21        | 0.23              | 12                    | 0.61                           | 3.4                                   | 6.30E-04                               | 30                    | 2.10E-05                      | 35                    |
|    | Average | 0.15 | 20        | 0.15              | 11                    | 0.69                           | 3.4                                   | 4.1E-03                                | 25                    | 4.1E-03                       | 31                    |
|    | σ       | 0.10 | 13        | 0.06              | 5.0                   | 0.23                           | 2.1                                   | 4.5E-03                                | 27                    | 4.5E-03                       | 26                    |
|    | min     | 0.01 | 8.7       | 0.05              | 4.2                   | 0.18                           | 1.0                                   | 0.0E+00                                | 5.4                   | 0.0E+00                       | 8.3                   |
|    | max     | 0.45 | 80        | 0.25              | 25                    | 1.10                           | 12                                    | 2.1E-02                                | 100                   | 2.1E-02                       | 110                   |

**Supplemental Table 2.** Quantitative lesion parameters for each tumor VOI and patient (P).

| P  | VOI Number | Maximum SUV <sub>bw</sub> | TBR  | Volume (cc) | FHV  |
|----|------------|---------------------------|------|-------------|------|
| 1  | 1          | 2.7                       | 2.9  | 26          | 94   |
| 2  | 1          | 2.0                       | 1.4  | 6.7         | 57   |
| 3  | 1          | 4.2                       | 5.2  | 21          | 100  |
|    | 2          | 3.2                       | 4.0  | 13          | 100  |
| 4  | 1          | 13                        | 8.0  | 5.2         | 100  |
| 5  | 1          | 2.3                       | 1.3  | 2.7         | 50   |
|    | 2          | 2.1                       | 1.2  | 17          | 2.3  |
|    | 3          | 2.6                       | 1.5  | 19          | 43   |
| 6  | 1          | 2.5                       | 1.9  | 17          | 100  |
|    | 2          | 2.6                       | 2.0  | 32          | 100  |
| 7  | 1          | 3.7                       | 2.9  | 150         | 94   |
| 8  | 1          | 3.5                       | 2.5  | 5.1         | 100  |
|    | 2          | 3.0                       | 2.1  | 7.6         | 100  |
| 9  | 1          | 2.2                       | 1.3  | 64          | 19   |
| 10 | 1          | 2.5                       | 1.3  | 28          | 2.1  |
|    | 2          | 1.1                       | 0.54 | 5.2         | 0.0  |
|    | 3          | 1.7                       | 0.87 | 8.8         | 0.0  |
|    | 4          | 1.2                       | 0.58 | 2.8         | 0.0  |
| 11 | 1          | 1.9                       | 1.1  | 11          | 0.0  |
|    | 2          | 1.8                       | 1.0  | 2.3         | 0.0  |
| 12 | 1          | 2.1                       | 0.81 | 2.8         | 0.0  |
| 13 | 1          | 5.8                       | 1.9  | 11          | 63   |
|    | 2          | 3.1                       | 1.0  | 1.7         | 0.0  |
|    | 3          | 5.3                       | 1.7  | 5.6         | 53   |
|    | 4          | 4.1                       | 1.3  | 8.0         | 12   |
|    | 5          | 5.6                       | 1.8  | 8.2         | 95   |
| 14 | 1          | 1.6                       | 0.71 | 52          | 0.0  |
| 15 | 1          | 2.3                       | 1.4  | 22          | 11   |
|    | 2          | 2.7                       | 1.6  | 17          | 29   |
| 16 | 1          | 1.4                       | 0.98 | 3.7         | 0.0  |
|    | 2          | 1.9                       | 1.3  | 7.7         | 6.3  |
|    | 3          | 1.7                       | 1.2  | 33          | 0.34 |
|    | 4          | 1.6                       | 1.1  | 20          | 0.0  |
|    | 5          | 1.2                       | 0.85 | 6.7         | 0.0  |
|    | Average    | 3.0                       | 1.8  | 19          | 39   |
|    | σ          | 2.2                       | 1.5  | 27          | 43   |
|    | min        | 1.1                       | 0.54 | 1.7         | 0.0  |
|    | max        | 13                        | 8.0  | 150         | 100  |

**Supplemental Table 3.** PKA results for average normal lung TACs.

| Normal Lung    |       |        |                            |                    |                                |                                    |                                     |                    |             |     |
|----------------|-------|--------|----------------------------|--------------------|--------------------------------|------------------------------------|-------------------------------------|--------------------|-------------|-----|
| Patient        | vB    | %SE vB | K <sub>1</sub> (mL/min/cc) | %SE K <sub>1</sub> | K <sub>1</sub> /k <sub>2</sub> | %SE K <sub>1</sub> /k <sub>2</sub> | k <sub>3</sub> (min <sup>-1</sup> ) | %SE k <sub>3</sub> | Maximum SUV | TBR |
| 1              | 0.098 | Inf    | 0.035                      | 15                 | 0.20                           | 6.9                                | 5.0E-03                             | 13                 | 0.8         | 0.9 |
| 2              | 0.20  | Inf    | 0.033                      | 17                 | 0.17                           | 9.2                                | 3.8E-03                             | 16                 | 1.1         | 0.8 |
| 3              | 0.13  | 33     | 0.057                      | 39                 | 0.19                           | 20                                 | 8.2E-03                             | 26                 | 0.8         | 1.1 |
| 4              | 0.15  | 12     | 0.023                      | 17                 | 0.25                           | 6.7                                | 0.0E+00                             | Inf                | 1.7         | 1.0 |
| 5              | 0.26  | 14     | 0.068                      | 36                 | 0.21                           | 18                                 | 0.0E+00                             | Inf                | 1.1         | 0.6 |
| 6              | 0.064 | 7.7    | 0.0098                     | 16                 | 0.079                          | 6.9                                | 1.3E-04                             | Inf                | 0.6         | 0.5 |
| 7              | 0.097 | 11     | 0.0072                     | 17                 | 0.11                           | 7.9                                | 2.5E-04                             | 12                 | 0.4         | 0.3 |
| 8              | 0.15  | 7.7    | 0.053                      | 31                 | 0.19                           | 13                                 | 4.1E-03                             | 27                 | 1.0         | 0.9 |
| 9              | 0.19  | Inf    | 0.011                      | 24                 | 0.11                           | 11                                 | 3.1E-03                             | Inf                | 0.7         | 0.5 |
| 10             | 0.17  | 17     | 0.041                      | 16                 | 0.22                           | 6.3                                | 0.0E+00                             | 33                 | 1.2         | 0.8 |
| 11             | 0.092 | 6.2    | 0.024                      | 21                 | 0.25                           | 9.5                                | 2.2E-03                             | 33                 | 0.6         | 0.4 |
| 12             | 0.25  | Inf    | 0.017                      | 25                 | 0.17                           | 10                                 | 1.7E-03                             | Inf                | 1.9         | 0.7 |
| 13             | 0.27  | Inf    | 0.017                      | 27                 | 0.19                           | 13                                 | 2.2E-04                             | Inf                | 2.2         | 0.7 |
| 14             | 0.13  | 6.6    | 0.0061                     | 20                 | 0.13                           | 5.9                                | 0.0E+00                             | Inf                | 0.8         | 0.4 |
| 15             | 0.13  | 14     | 0.046                      | 25                 | 0.11                           | 11                                 | 1.8E-04                             | Inf                | 1.6         | 1.0 |
| 16             | 0.11  | Inf    | 0.019                      | 71                 | 0.13                           | 32                                 | 2.2E-04                             | Inf                | 0.7         | 0.5 |
| <b>Average</b> | 0.16  | 14     | 0.029                      | 26                 | 0.17                           | 12                                 | 1.8E-03                             | 23                 | 1.1         | 0.7 |
| <b>σ</b>       | 0.063 | 9.7    | 0.019                      | 14                 | 0.052                          | 6.8                                | 2.4E-03                             | 9.3                | 0.5         | 0.2 |
| <b>min</b>     | 0.064 | 6.2    | 0.0061                     | 15                 | 0.079                          | 5.9                                | 0.0E+00                             | 12                 | 0.4         | 0.3 |
| <b>max</b>     | 0.27  | 41     | 0.068                      | 71                 | 0.25                           | 32                                 | 8.2E-03                             | 33                 | 2.2         | 1.1 |

**Supplemental Table 4.** PKA results for average muscle TACs.

| Patient        | Muscle  |        |                            |                    |                                |                                    |                                     |                    |             |     |
|----------------|---------|--------|----------------------------|--------------------|--------------------------------|------------------------------------|-------------------------------------|--------------------|-------------|-----|
|                | vB      | %SE vB | K <sub>1</sub> (mL/min/cc) | %SE K <sub>1</sub> | K <sub>1</sub> /k <sub>2</sub> | %SE K <sub>1</sub> /k <sub>2</sub> | k <sub>3</sub> (min <sup>-1</sup> ) | %SE k <sub>3</sub> | Maximum SUV | TBR |
| 1              | 0.0E+00 | Inf    | 0.046                      | 5.4                | 1.1                            | 7.9                                | 2.1E-03                             | 38                 | 1.7         | 1.8 |
| 2              | 5.8E-04 | Inf    | 0.059                      | 6.1                | 1.1                            | 18                                 | 6.8E-05                             | 52                 | 1.9         | 1.4 |
| 3              | 2.5E-04 | 24     | 0.028                      | 3.4                | 1.5                            | 8.6                                | 3.8E-03                             | Inf                | 2.2         | 2.8 |
| 4              | 7.9E-03 | 30     | 0.021                      | 3.2                | 1.0                            | 4.6                                | 9.9E-05                             | 44                 | 2.0         | 1.2 |
| 5              | 6.0E-03 | 200    | 0.032                      | 5.6                | 0.96                           | 4.4                                | 9.3E-04                             | 20                 | 2.3         | 1.3 |
| 6              | 1.4E-03 | 20     | 0.049                      | 4.7                | 0.83                           | 5.9                                | 2.3E-03                             | 26                 | 1.6         | 1.4 |
| 7              | 2.1E-02 | 28     | 0.025                      | 3.0                | 0.70                           | 6.0                                | 2.0E-03                             | Inf                | 1.3         | 1.0 |
| 8              | 4.2E-03 | 59     | 0.022                      | 7.5                | 0.86                           | 9.4                                | 0.0E+00                             | Inf                | 1.6         | 1.4 |
| 9              | 4.5E-03 | Inf    | 0.023                      | 5.8                | 0.67                           | 7.2                                | 5.5E-05                             | Inf                | 1.6         | 1.0 |
| 10             | 0.0E+00 | 20     | 0.028                      | 4.5                | 0.75                           | 6.3                                | 0.0E+00                             | 53                 | 1.7         | 1.1 |
| 11             | 1.4E-02 | 35     | 0.021                      | 4.3                | 0.63                           | 3.4                                | 1.4E-03                             | 36                 | 1.6         | 0.9 |
| 12             | 7.5E-03 | Inf    | 0.049                      | 3.0                | 0.82                           | 5.5                                | 1.0E-03                             | Inf                | 2.9         | 1.1 |
| 13             | 0.0E+00 | Inf    | 0.021                      | 2.7                | 0.80                           | 7.2                                | 6.5E-05                             | Inf                | 2.9         | 0.9 |
| 14             | 0.0E+00 | 13     | 0.013                      | 2.8                | 0.74                           | 2.6                                | 2.0E-04                             | Inf                | 1.7         | 0.9 |
| 15             | 2.1E-02 | 18     | 0.039                      | 2.6                | 0.90                           | 4.1                                | 0.0E+00                             | 15                 | 1.6         | 1.0 |
| 16             | 5.6E-03 | Inf    | 0.020                      | 3.1                | 0.62                           | 5.6                                | 3.4E-03                             | Inf                | 1.5         | 1.1 |
| <b>Average</b> | 5.9E-03 | 45     | 0.031                      | 4.2                | 0.87                           | 6.7                                | 1.1E-03                             | 35                 | 1.9         | 1.3 |
| <b>σ</b>       | 7.1E-03 | 57     | 0.013                      | 1.5                | 0.22                           | 3.5                                | 1.3E-03                             | 14                 | 0.5         | 0.5 |
| <b>min</b>     | 0.0E+00 | 13     | 0.013                      | 2.6                | 0.62                           | 2.6                                | 0.0E+00                             | 15                 | 1.3         | 0.9 |
| <b>max</b>     | 2.1E-02 | 200    | 0.059                      | 7.5                | 1.5                            | 18                                 | 3.8E-03                             | 53                 | 2.9         | 2.8 |

**Supplemental Table 5.** Results of the voxelwise correlation between  $K_1$  and  $k_3$ .

| P  | VOI      | Tumor |         | Normal Lung |         | Muscle |         |
|----|----------|-------|---------|-------------|---------|--------|---------|
|    |          | R     | p-Value | R           | p-Value | R      | p-Value |
| 1  | 1        | -0.40 | <0.001  | 0.37        | <0.001  | -0.23  | <0.001  |
| 2  | 1        | 0.05  | 0.68    | 0.38        | <0.001  | 0.38   | 0.06    |
| 3  | 1        | -0.48 | <0.001  | 0.19        | <0.001  | -0.14  | 0.23    |
|    | 2        | -0.80 | <0.001  |             |         |        |         |
| 4  | 1        | -0.51 | <0.001  | 0.35        | <0.001  | 0.53   | <0.001  |
| 5  | 1        | -0.61 | <0.001  | 0.04        | 0.17    | 0.32   | <0.001  |
|    | 2        | -0.64 | <0.001  |             |         |        |         |
|    | 3        | -0.46 | <0.001  |             |         |        |         |
| 6  | 1        | -0.25 | <0.001  | 0.02        |         | -0.14  | 0.16    |
|    | 2        | -0.35 | <0.001  |             |         |        |         |
| 7  | 1        | -0.33 | <0.001  | 0.24        | <0.001  | 0.56   | <0.001  |
| 8  | 1        | -0.16 | 0.26    | -0.08       | <0.001  | 0.82   | <0.001  |
|    | 2        | -0.97 | <0.001  |             |         |        |         |
| 9  | 1        | -0.42 | <0.001  | 0.61        |         | 0.29   | <0.001  |
| 10 | 1        | 0.09  | 0.15    | 0.41        | <0.001  | -0.08  | 0.92    |
|    | 2        | -0.45 | <0.001  |             |         |        |         |
|    | 3        | -0.34 | <0.001  |             |         |        |         |
|    | 4        | -0.16 | 0.46    |             |         |        |         |
| 11 | 1        | -0.25 | 0.01    | -0.17       | <0.001  | 0.90   | <0.001  |
|    | 2        | 0.12  | 0.59    |             |         |        |         |
| 12 | 1        | 0.11  | 0.61    | 0.30        | <0.001  | -0.01  | 0.88    |
| 13 | 1        | -0.07 | 0.45    | 0.50        | <0.001  | 0.87   | <0.001  |
|    | 2        | -0.35 | 0.18    |             |         |        |         |
|    | 3        | -0.59 | <0.001  |             |         |        |         |
|    | 4        | -0.48 | <0.001  |             |         |        |         |
|    | 5        | 0.15  | 0.17    |             |         |        |         |
| 14 | 1        | 0.34  | <0.001  | 0.44        | <0.001  | 0.42   | <0.001  |
| 15 | 1        | -0.45 | <0.001  | 0.30        | <0.001  | 0.67   | <0.001  |
|    | 2        | -0.66 | <0.001  |             |         |        |         |
| 16 | 1        | 0.37  | <0.001  | -0.04       | 0.12    | -0.51  | <0.001  |
|    | 2        | -0.42 | <0.001  |             |         |        |         |
|    | 3        | 0.33  | <0.001  |             |         |        |         |
|    | 4        | 0.43  | <0.001  |             |         |        |         |
|    | 5        | 0.72  | <0.001  |             |         |        |         |
|    | Average  | -0.23 |         | 0.34        |         | 0.58   |         |
|    | $\sigma$ | 0.39  |         | 0.15        |         | 0.23   |         |
|    | min      | -0.97 |         | -0.17       |         | -0.51  |         |
|    | max      | 0.72  |         | 0.61        |         | 0.90   |         |
